# Supplementary material for: Acetate sensing by GPR43 alarms neutrophils and protects from severe sepsis
Source: PubMed Central journal article supplement (PMC8324776; doi:10.1038/s42003-021-02427-0), 2021-07-30
Supplement: 42003_2021_2427_MOESM1_ESM.pdf [file 42003_2021_2427_MOESM1_ESM.pdf]

1 **Acetate sensing by GPR43 alarms neutrophils and protects from severe sepsis**

2 Katja Schlatterer<sup>1,2,3</sup>, Christian Beck<sup>1,2,3</sup>, Ulrich Schoppmeier<sup>4,2,3</sup>, Andreas Peschel<sup>1,2,3\*</sup>,  
3 Dorothee Kretschmer<sup>1,2,3</sup>

4

5 <sup>1</sup> Interfaculty Institute for Microbiology and Infection Medicine Tübingen (IMIT), Infection  
6 Biology, University of Tübingen, Auf der Morgenstelle 28, 72076 Tübingen, Germany

7 <sup>2</sup> German Center for Infection Research, partner site Tübingen, Germany

8 <sup>3</sup> Cluster of Excellence EXC 2124 Controlling Microbes to Fight Infections

9 <sup>4</sup> Interfaculty Institute for Microbiology and Infection Medicine Tübingen (IMIT), Medical  
10 Microbiology and Hygiene, University of Tübingen, Elfriede-Aulhorn-Straße 6, 72076  
11 Tübingen, Germany

12

13

14

15

16 **Supplementary Materials**

17

18 Suppl. Figure 1: GPR43 activation increases oxidative burst in human neutrophils.

19 Suppl. Figure 2: In-vitro impact of GPR43 activation on chemotaxis, receptor  
20 expression, cytokine secretion, and bacterial elimination.

21 Suppl. Figure 3: Immunological characteristics of wild-type and GPR43<sup>-/-</sup> mice 30  
22 minutes after intraperitoneal acetate treatment.

23 Suppl. Figure 4: Sepsis-induced weight loss in acetate-treated mice and bacterial  
24 counts in mouse peritoneum and spleen upon intraperitoneal acetate application.

25 Suppl. Figure 5: Blood cytokines in mouse serum upon intraperitoneal acetate  
26 application.

27 Suppl. Figure 6: Sepsis-induced weight loss and bacterial burden in mouse spleen and  
28 kidneys after oral administration of acetate.

29 Suppl. Figure 7: Gating strategies for flow cytometric analysis of human and mouse  
30 neutrophils.

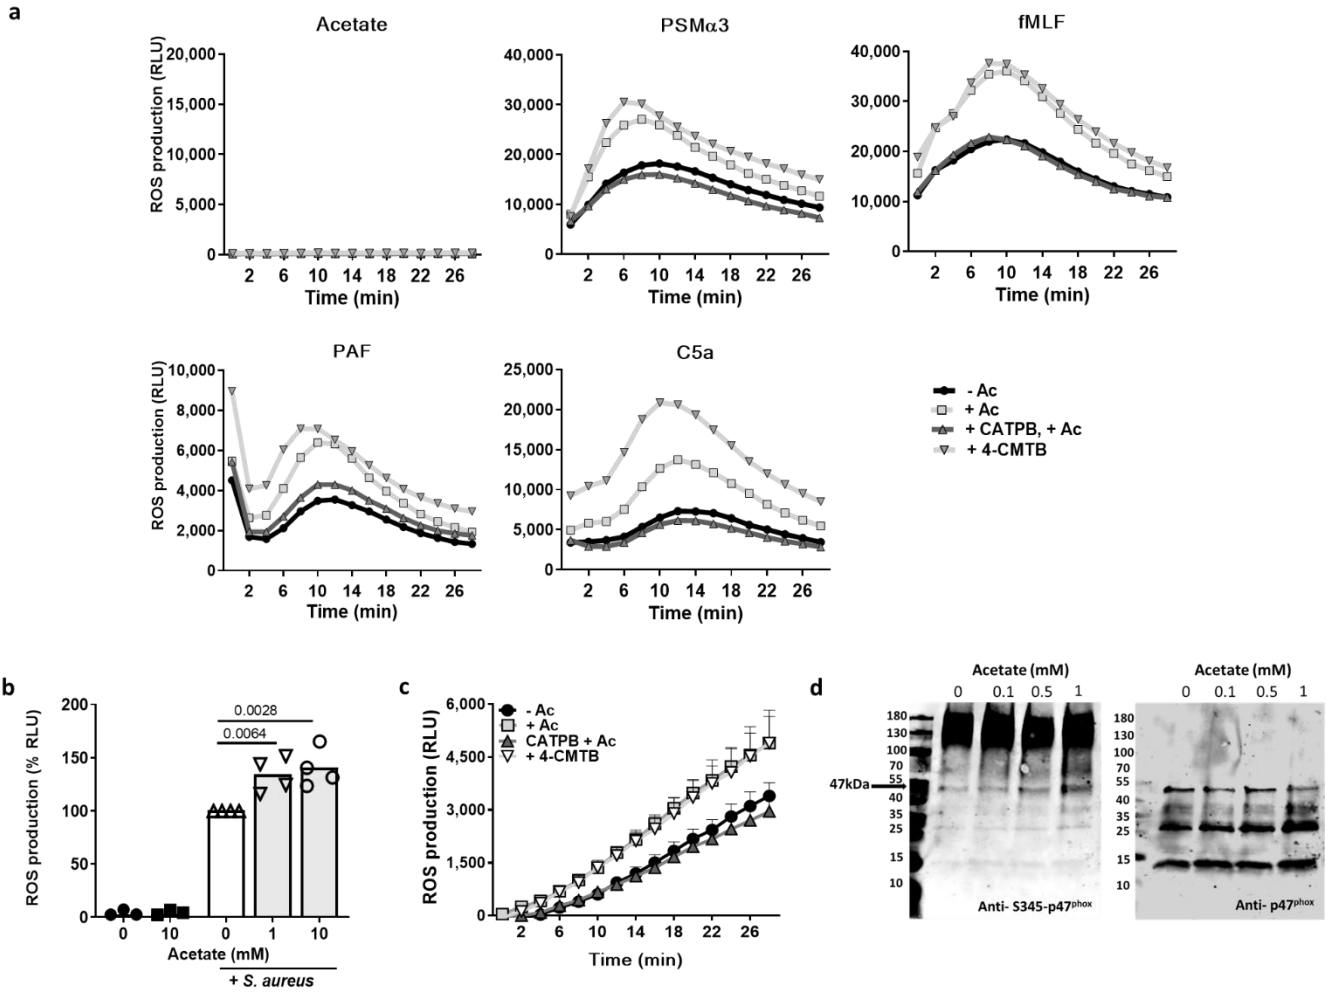

31

32 **Suppl. Figure 1: GPR43 activation increases oxidative burst in human**  
 33 **neutrophils.**

34 (a) The oxidative burst induced by the bacteria-derived fMLF (500 nM), PSM $\alpha$ 3 (500  
 35 nM), host-derived GPCR ligands PAF (2  $\mu$ M), or C5a (100 ng/ml) or (b, c) by *S. aureus*  
 36 cells (MOI 2) was enhanced by acetate pre-treatment, which could be inhibited by the  
 37 GPR43 antagonist CATPB. The synthetic agonist 4-CMTB mimicked the effect of  
 38 acetate, which was completely reversible by addition of CATPB. (d) Western blot-  
 39 based detection of phosphorylated p47<sup>phox</sup> (S345) and p47<sup>phox</sup> in neutrophils treated  
 40 with the indicated acetate concentration for three minutes. P47<sup>phox</sup> and the  
 41 phosphorylation site S345 were visualized on the same gel using mouse anti-human  
 42 p47<sup>phox</sup> and rabbit anti-human p47<sup>phox</sup> S345 antibodies and the respective IRDye  
 43 secondary antibodies. P47<sup>phox</sup> has a size of 47 kDa and appears between the size  
 44 marker for 55 and 40 kDa. Gel pictures are unprocessed as gained on the Licor  
 45 Odyssey CLx. Data in panels a-c represent means or means  $\pm$  SEMs (c) from n=4 (b)

46 and n=5 (a, c) independent experiments. d shows one representative western blot. P  
47 values represent significant difference versus the indicated condition as calculated by  
48 one-way ANOVA with Dunnett's multiple comparisons test (a).

49

50

51

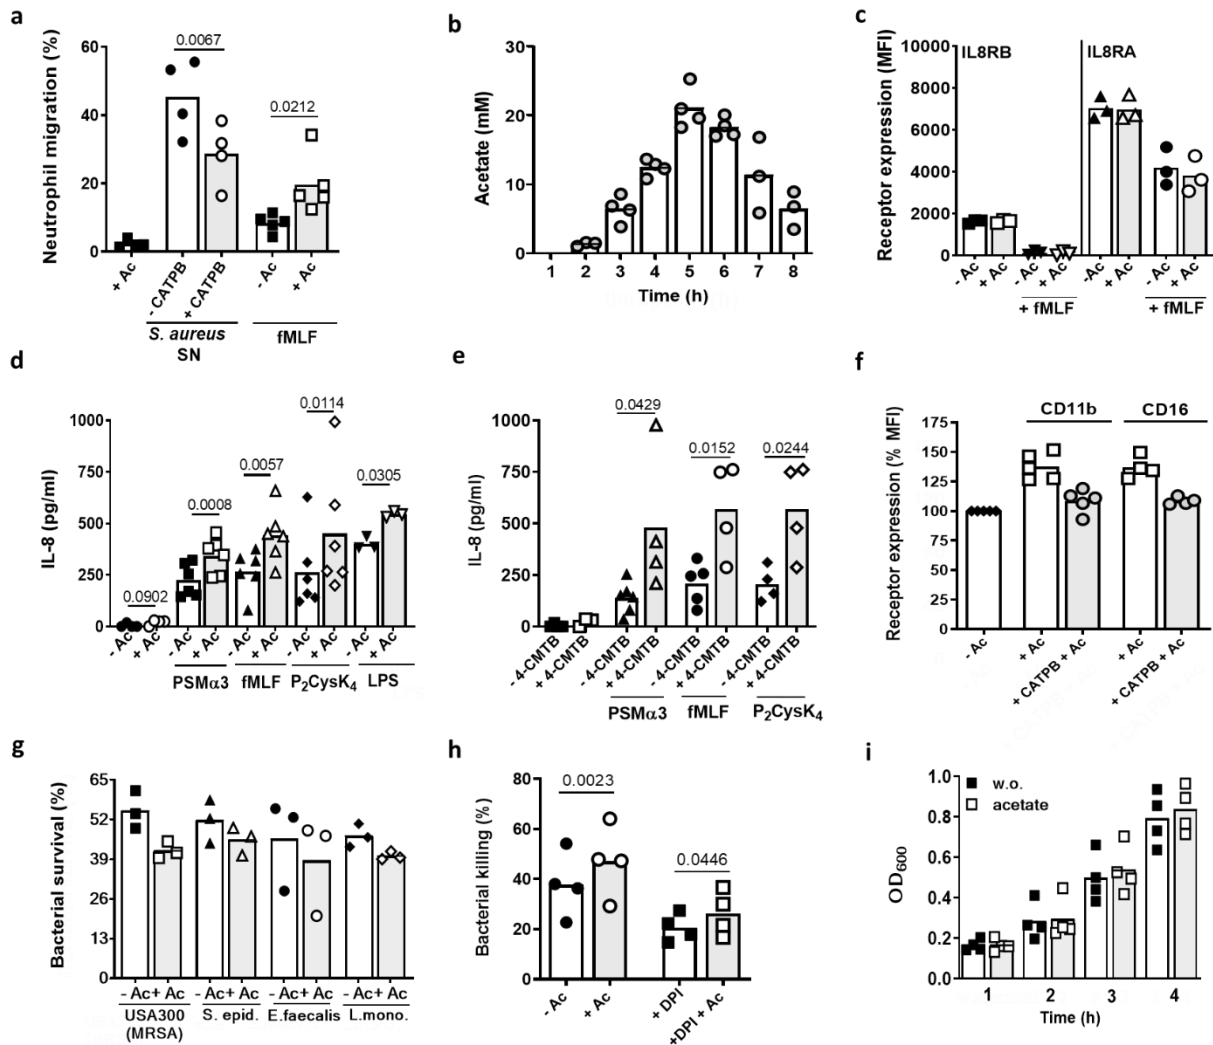

52

53 **Suppl. Figure 2: *In-vitro* impact of GPR43 activation on chemotaxis, receptor**  
 54 **expression, cytokine secretion, and bacterial elimination.**

55 (a) GPR43 inhibition by CATPB decreased the migration of neutrophils towards *S.*  
 56 *aureus* culture filtrates (10-fold diluted) and pre-incubation of neutrophils with 1 mM  
 57 acetate enhanced the migration towards 10 nM of the FPR1 ligand fMLF (b) *S. aureus*  
 58 produced up to 20 mM acetate during cultivation in broth. (c) Expression of the IL-8  
 59 receptors IL8RB and IL8RA is not affected by acetate treatment (1mM). (d/ e)  
 60 Neutrophil priming with acetate or the synthetic GPR43 agonist 4-CMTB increased IL-  
 61 8 secretion following stimulation by the FPR2 ligand PSM $\alpha$ 3 (500 nM), the FPR1 ligand  
 62 fMLF (500 nM), the TLR2 ligand P<sub>2</sub>CysK<sub>4</sub> (200 ng/ml), or the TLR4 ligand LPS (100  
 63 nM). (f) The acetate-mediated enhanced expression of complement receptor CD11b  
 64 and Fc receptor CD16 could be prevented by CATPB indicating that it is GPR43-

65 dependent. (g) Acetate-treated neutrophils showed increased killing of serum-  
66 opsonized *S. aureus* USA300 (MRSA), *S. epidermidis*, *E. faecalis*, and *L.*  
67 *monocytogenes*. (h) Inhibition of the NADPH oxidase by dibenziodolium chloride (DPI)  
68 decreased the positive effect of acetate on the bacterial killing but did not abolish it. (i)  
69 Supplementation of growth media with 10 mM acetate showed no inhibitory effect on  
70 bacterial growth. Data in panels a, b, e, h, i represent means from n=4, in panel c and  
71 d represents means from n=3 and from panel f and d represents means from n=5  
72 independent experiments. The indicated p values represent significant difference  
73 versus the negative control as calculated by paired two-tailed Student's t-test.

74

75

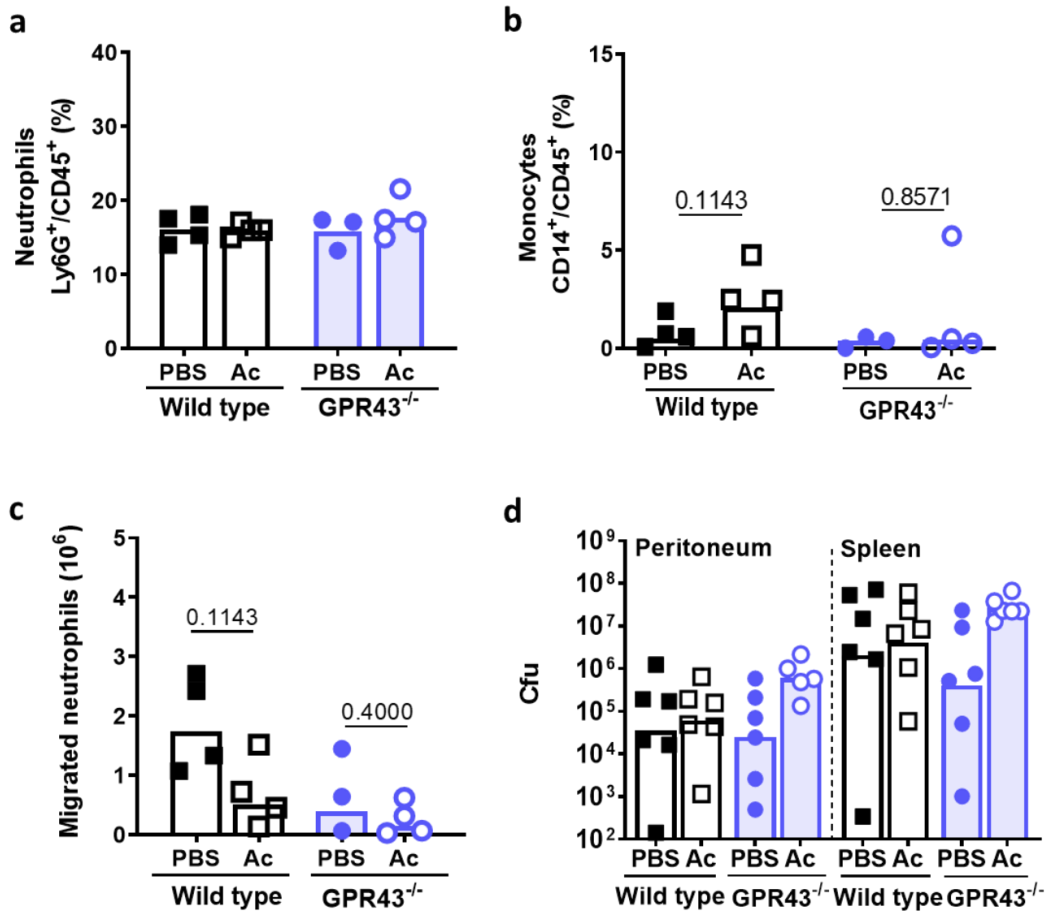

76

77 **Suppl. Figure 3: Immunological characteristics of wild-type and GPR43<sup>-/-</sup> mice 30**  
 78 **minutes after intraperitoneal acetate treatment.**

79 Percentage of blood (a) Ly6G<sup>+</sup>/CD45<sup>+</sup> neutrophils or (b) CD14<sup>+</sup>/CD45<sup>+</sup> monocytes in  
 80 intraperitoneally PBS or acetate-treated wild-type and GPR43<sup>-/-</sup> mice. (c) Neutrophil  
 81 numbers in the peritoneal cavity 30 minutes after acetate (Ac) or PBS injection. (d)  
 82 Serum acetate levels in wild-type or GPR43<sup>-/-</sup> mice 30 minutes after PBS treatment  
 83 (blood isolated by cardiac puncture). (d) *S. aureus* loads recovered from peritoneum  
 84 and spleen at six hours after infection in a peritonitis model. Data in all panels represent  
 85 geometric means from four (a –c) or six (d) animals per group. P values represent  
 86 significant difference versus the PBS control as calculated by Mann-Whitney Test.

87

88

89

90

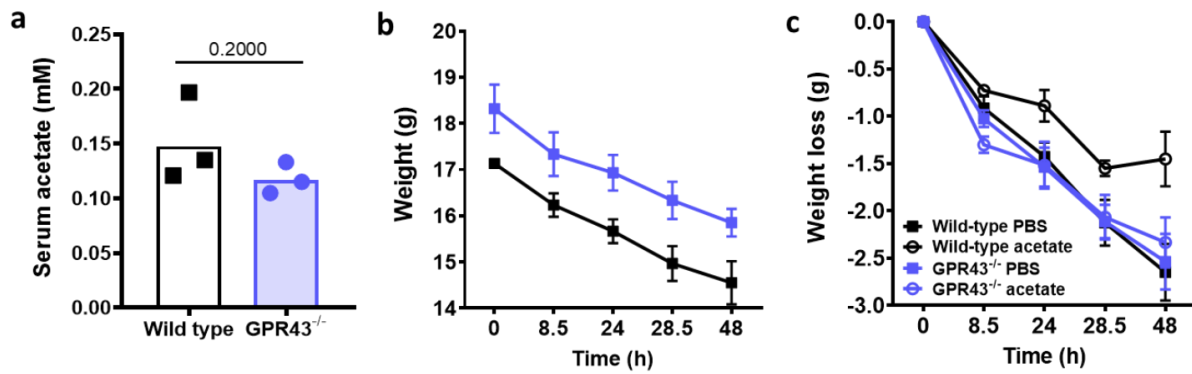

91

92 **Suppl. Figure 4: Sepsis-induced weight loss in acetate-treated mice and**  
 93 **bacterial counts in mouse peritoneum and spleen upon intraperitoneal acetate**  
 94 **application.**

95 (a) Total body weight (in gram) in wild-type and GPR43<sup>-/-</sup> mice after intravenous *S.*  
 96 *aureus* injection. At similar age, GPR43<sup>-/-</sup> mice have a higher basal weight compared  
 97 to wild-type mice. (b) Comparison of sepsis-induced weight loss (in gram) in acetate-  
 98 or PBS-treated wild-type or GPR43<sup>-/-</sup> mice showed similar weight loss between PBS-  
 99 treated wild-type and GPR43<sup>-/-</sup> mice. Data in all panels represent geometric means of  
 100 three (a) or geometric means ± SEM or six mice (b, c) per group. P values represent  
 101 significant difference versus the indicated PBS control as calculated by Mann-Whitney-  
 102 U test.

103

104

105

106

107

108

109

110

111

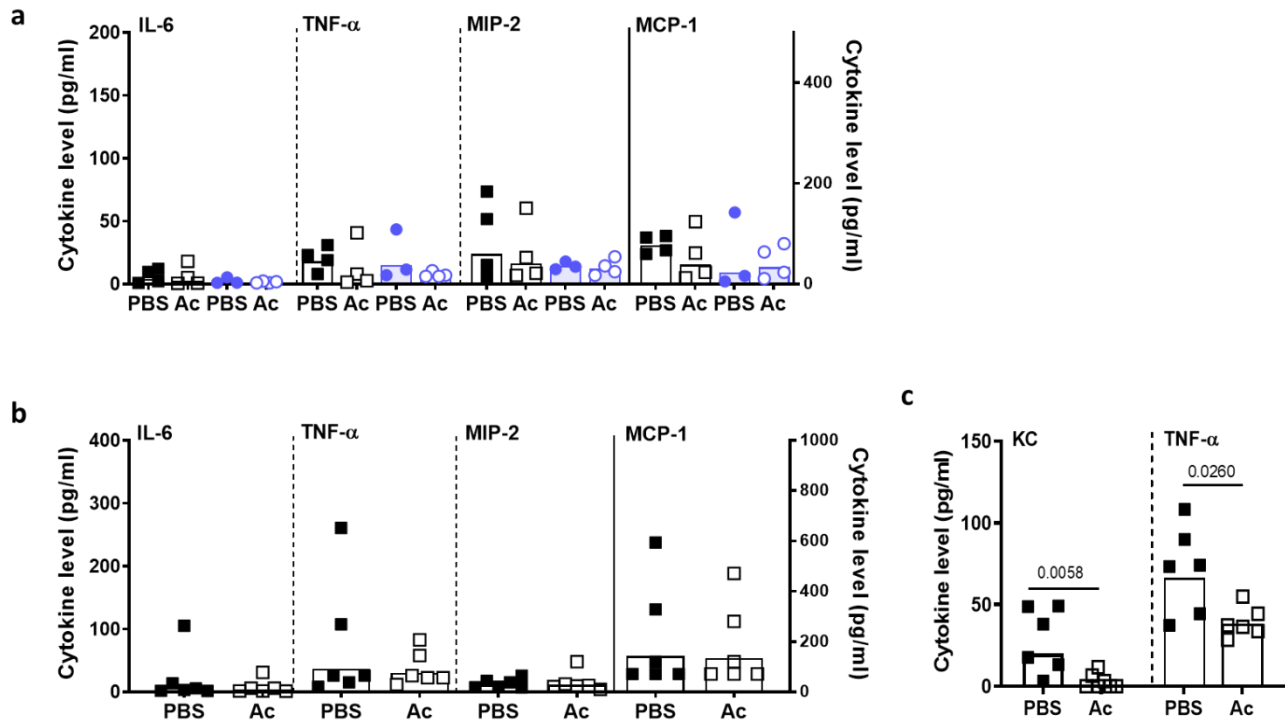

112

113 **Suppl. Figure 5: Blood cytokines in mouse serum upon intraperitoneal acetate**  
 114 **application.**

115 (a) 30 minutes after acetate or PBS injection, blood cytokine levels in wild-type and  
 116 GPR43 knockout mice showed no difference. (b) No difference in blood cytokine levels  
 117 was observed in wild-type mice, six hours after acetate or PBS injection. (c) Acetate-  
 118 treated wild-type mice showed reduced cytokine (KC, TNF-α) levels 48 hours after the  
 119 onset of a *S. aureus* bloodstream infection. Data in all panels represent means of four  
 120 (a) or six (b) mice per group. \*,  $P < 0.05$  difference versus the indicated PBS control  
 121 as calculated by Mann-Whitney-U test.

122

123

124

125

126

127



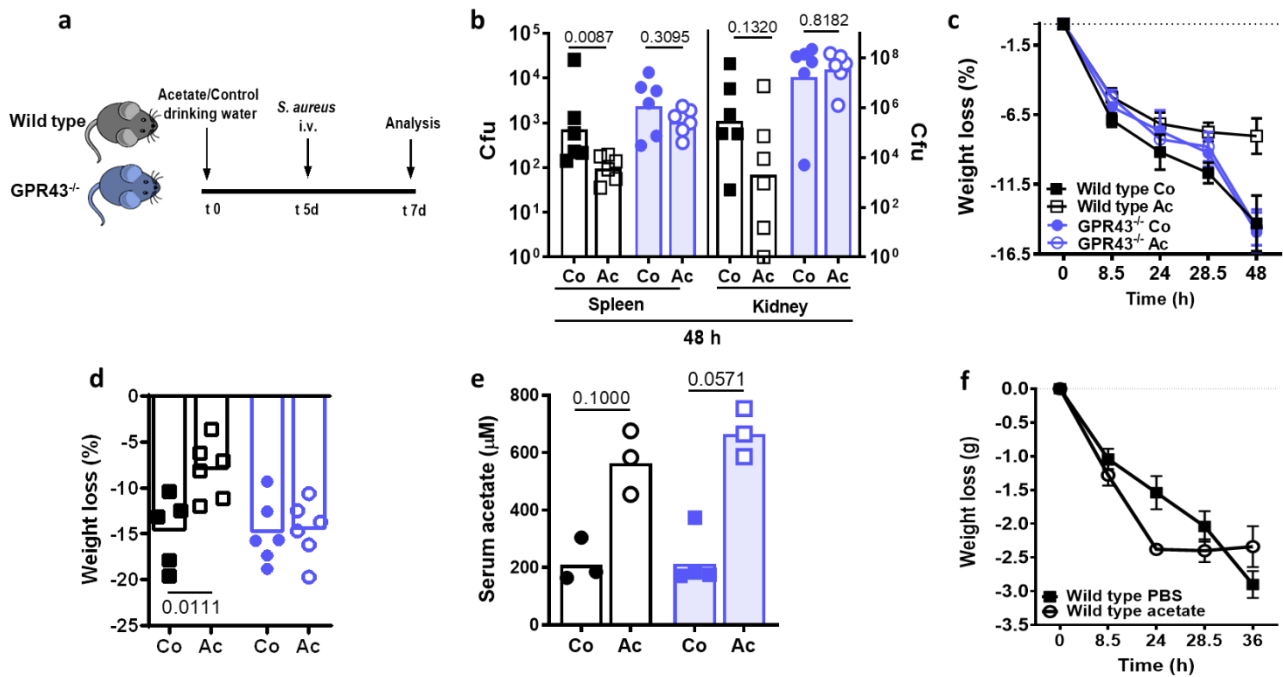

129

130 **Suppl. Figure 6: Sepsis-induced weight loss and bacterial burden in mouse**  
 131 **spleen and kidneys after oral administration of acetate.**

132 (a) Wild-type or GPR43<sup>-/-</sup> mice were fed for seven days with 150 mM sodium acetate  
 133 (Ac) or sodium chloride (Co) in the drinking water. Five days after treatment start, *S.*  
 134 *aureus* sepsis was induced and bacterial loads were analysed 48 hours later. Acetate-  
 135 treated wild-type mice showed significantly reduced bacterial loads in the spleen (b),  
 136 which was accompanied by significantly reduced weight loss after 48 hours (c, d). (e)  
 137 Application of sodium acetate in the drinking water resulted in an increased serum  
 138 acetate level in wild-type and GPR43 knockout mice (blood isolated by cardiac  
 139 puncture) measured 48 h after sepsis onset. (f) Intraperitoneal acetate injection 6 hours  
 140 post-sepsis induction with 10<sup>7</sup> cfu influence weight loss in wild-type mice. Data in figure  
 141 e represent geometric means of three or four mice per group. Data in all other panels  
 142 represent geometric means or geometric means ± SEM (c, f) of six mice per group. P  
 143 values represent significant difference versus the indicated control (Co) as calculated  
 144 by Mann-Whitney-U test.

145

146

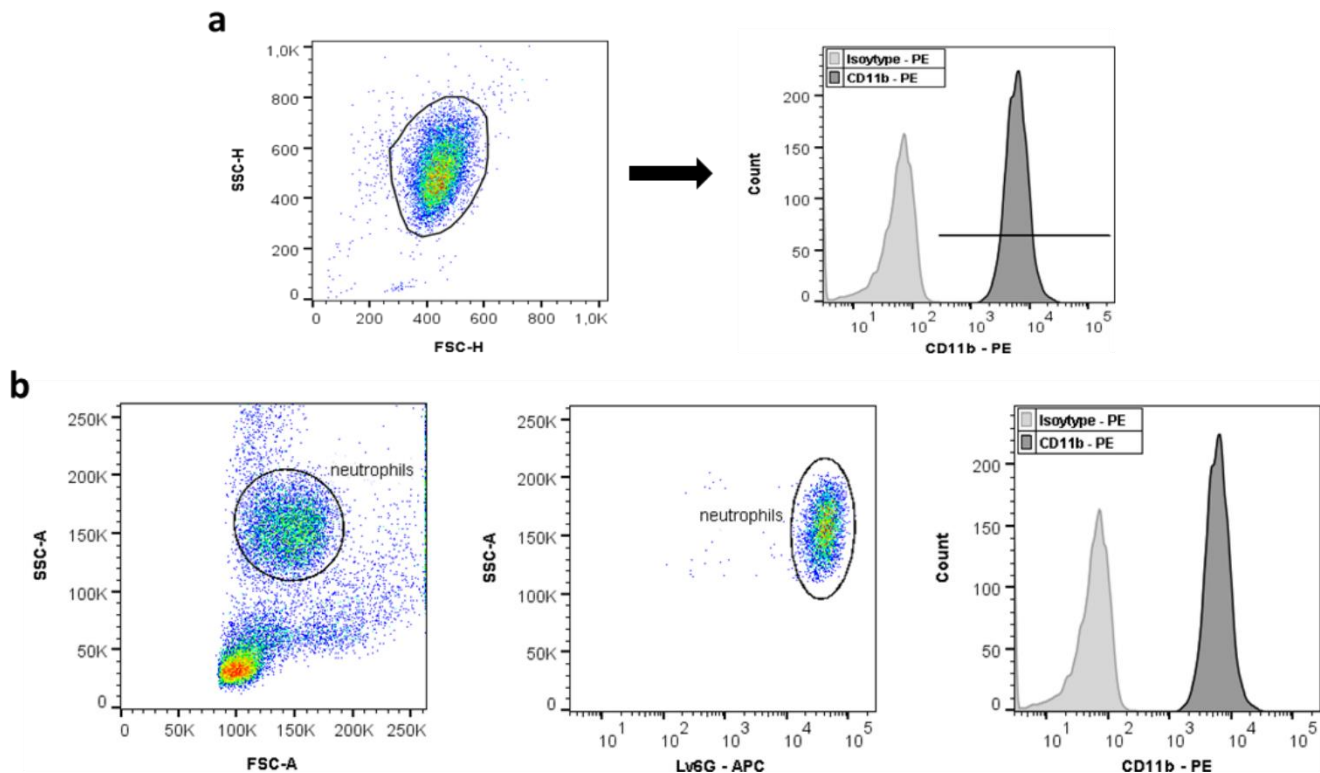

147

148 **Suppl. Figure 7: Gating strategies for flow cytometric analysis of human and**  
 149 **mouse neutrophils.**

150 (a) Gating strategy for human neutrophil assays. Neutrophils were separated by  
 151 Histopaque/Ficoll gradient and subsequent gating of neutrophils occurred at the  
 152 FSC/SSC density plot according to size and granularity (left). Histopaque/Ficoll  
 153 gradient isolations showed a neutrophil purity of more than 80%. With the help of  
 154 isotype or negative controls and the FL2 (PE) or FL1 (CFSE) fluorescence channel,  
 155 the gated population was subdivided into fluorescence-positive and -negative cells  
 156 (right). The receptor expression or phagocytic capacity was expressed as product of  
 157 the mean fluorescence of the fluorescence-positive population and their relative  
 158 abundance (mean fluorescence intensity, MFI). (b) Gating strategy for mouse  
 159 neutrophil assays. Whole mouse blood was erythrocyte-lysed and subsequent  
 160 neutrophil gating occurred at the FSC/SSC density according to size and granularity  
 161 (left) and with Ly6G – allophycocyanin (APC) staining (middle). With the help of isotype  
 162 or negative controls and the FL2 (PE) or FL1 (DCFDA) fluorescence channel, the gated  
 163 population was subdivided into fluorescence-positive and -negative cells (right). The  
 164 receptor expression or ROS production was expressed as product of the mean  
 165 fluorescence of the fluorescence-positive population and their relative abundance  
 166 (mean fluorescence intensity, MFI).
