# Supplementary material for: Acetate sensing by GPR43 alarms neutrophils and protects from severe sepsis
Source: PubMed Central journal article supplement (PMC8324776; doi:10.1038/s42003-021-02427-0), 2021-07-30
Supplement: 42003_2021_2427_MOESM3_ESM.pdf [file 42003_2021_2427_MOESM3_ESM.pdf]

## **Description of additional Supplementary Files**

**File name:** Supplementary Data 1

**Description:** Source data of main figures.
